# Supplementary material
Source: Springer Nature journal article supplement (https://www.springermedizin.de/resource/supplementary/12916_2012_792_MOESM10_ESM.pdf/9598688)

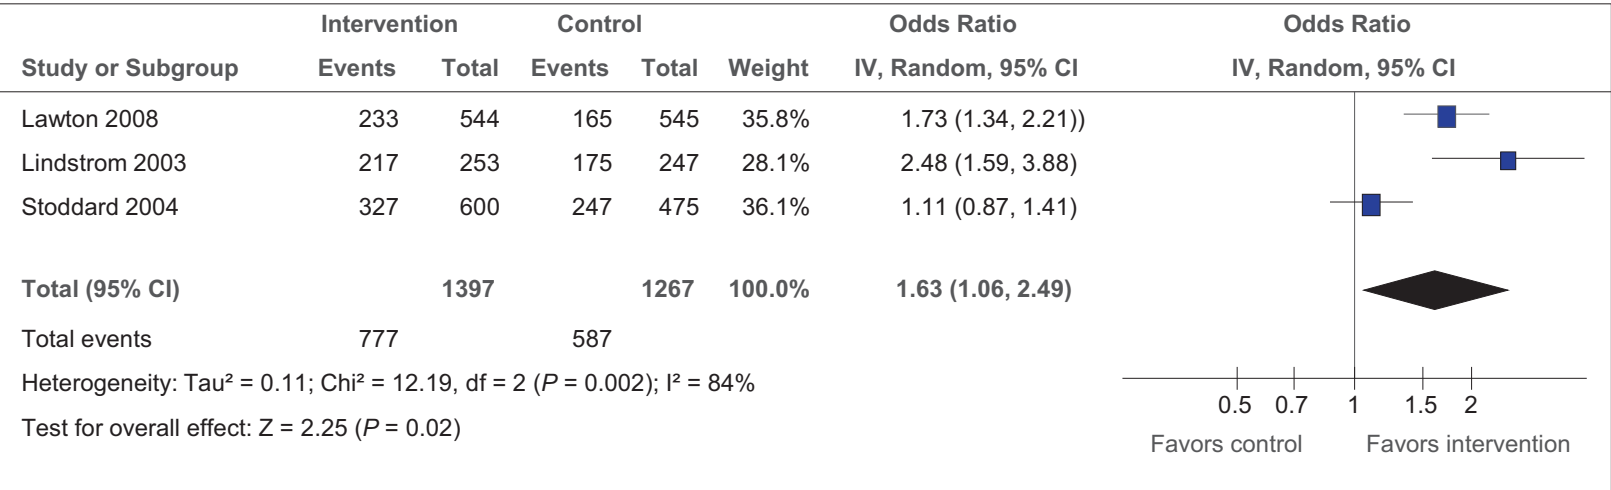

Supplement: MOESM10 [file 9598688]
